# Supplementary material
Source: PubMed Central journal article supplement (PMC9121304)
Supplement: jamaophthalmol-e221002-s001.pdf [file jamaophthalmol-e221002-s001.pdf]

## Supplemental Online Content

Boulakh L, Nygaard B, Bek T, et al. Nationwide incidence of thyroid eye disease and cumulative incidence of strabismus and surgical interventions in Denmark. *JAMA Ophthalmol*. Published online May 19, 2022. doi:10.1001/jamaophthalmol.2022.1002

**eFigure 1.** Flowchart of the Danish nationwide register study of thyroid eye disease

**eTable 1.** List of diagnoses codes used in the study

**eFigure 2.** The distribution of sex in thyroid eye disease patients

**eTable 2.** Annual incidence (per 100,000) of thyroid eye disease in Denmark 2000-2018

**eTable 3.** Sex and the mean age of the thyroid eye disease patients in Denmark from 2000-2018

**eTable 4.** The calculated mean incidence (per 100,000/year) of thyroid eye disease in Denmark from 2000-2018

**eTable 5.** The thyroid medication prescribed in patients who were euthyroid at the time of being diagnosed with thyroid eye disease

**eTable 6.** The cumulative incidence of being diagnosed with strabismus after being diagnosed with thyroid eye disease

**eTable 7.** The cumulative incidence of being diagnosed with strabismus after being diagnosed with thyroid eye disease stratified by sex

**eTable 8.** The cumulative incidence of undergoing strabismus surgery after being diagnosed with thyroid eye disease

**eTable 9.** The cumulative incidence of undergoing strabismus surgery after being diagnosed with thyroid eye disease stratified by sex

**eTable 10.** The cumulative incidence of undergoing decompression surgery after being diagnosed with thyroid eye disease

**eTable 11.** The cumulative incidence of undergoing decompression surgery after being diagnosed with thyroid eye disease stratified by sex

This supplemental material has been provided by the authors to give readers additional information about their work.

**Figure 1.** Flowchart of the Danish nationwide register study of thyroid eye disease

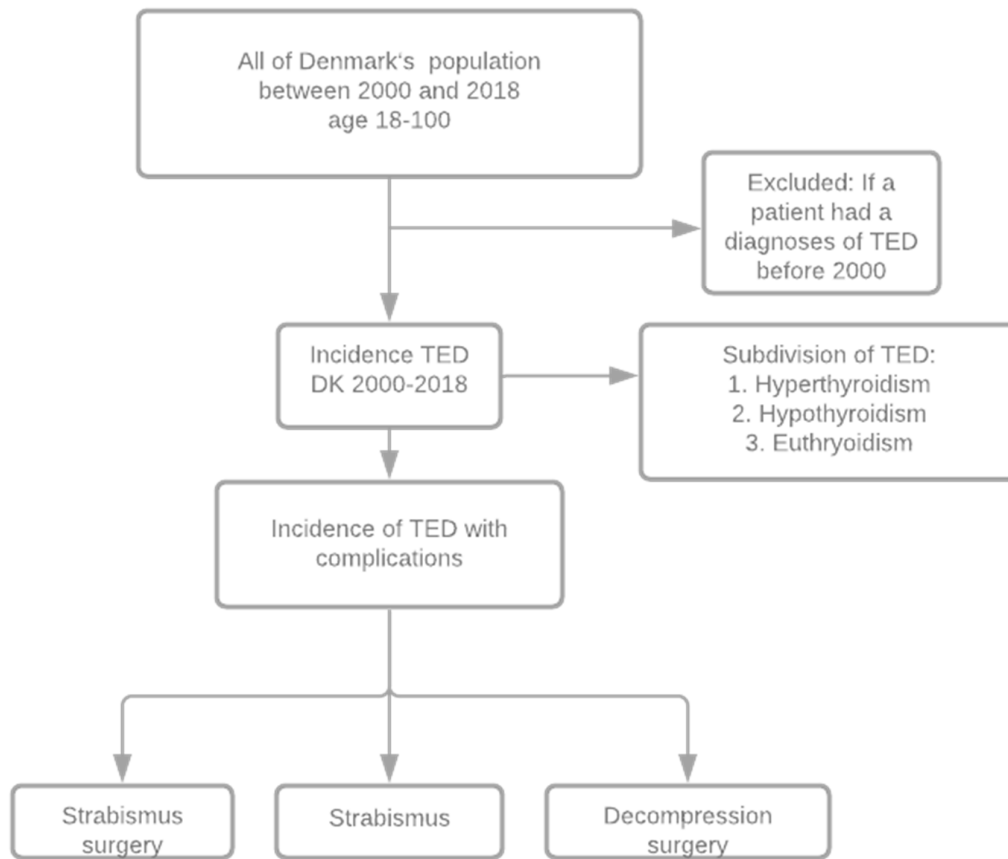

**eTable 1.** List of diagnoses codes used in the study

| <b>Disease</b>            | <b>ICD (International Classification of Disease), ATC (Anatomical Therapeutic Chemical Code), NOMESCO (Nordic Medicostatistical Classification of Surgical Procedures)</b>                                                                                                                                                                                                                                                                                                                                                                                                                                                                                                                                                                                                                                                                                           |
|---------------------------|----------------------------------------------------------------------------------------------------------------------------------------------------------------------------------------------------------------------------------------------------------------------------------------------------------------------------------------------------------------------------------------------------------------------------------------------------------------------------------------------------------------------------------------------------------------------------------------------------------------------------------------------------------------------------------------------------------------------------------------------------------------------------------------------------------------------------------------------------------------------|
| Thyroid Eye Disease (TED) | <p><b>ICD-8 and ATC</b></p> <p>Morbus basedowi, struma diffusa toxica cum exophthalmo (24200) OR Exophthalmus malignus (24201) and two prescriptions OR Exophthalmus (sine thyreotoxicosi) (78111) and two prescriptions</p> <p><i>Prescription definition:</i> At least 2 redeemed prescriptions within the 5 preceding years of:</p> <p>Thiouracils (H03BA) OR Propylthiouracil (H03BA02) OR Carbimazole (H03BB01) OR Thiamazole (H03BB02) OR Levothyroxine sodium (H03AA01)</p> <p><b>ICD-10 and ATC</b></p> <p>Dysthyroid exophthalmos (DH62) OR Exophthalmic conditions (DH052) and two prescriptions</p> <p><i>Prescription definition:</i> At least 2 redeemed prescriptions within the 5 preceding years of:</p> <p>Thiouracils (H03BA) OR Propylthiouracil (H03BA02) OR Carbimazole (H03BB01) OR Thiamazole (H03BB02) OR Levothyroxine sodium (H03AA01)</p> |
| Strabismus                | <p><b>ICD-10 and ATC</b></p> <p>Other type of strabismus (DH50) OR Esotropia alternans (DH500A) OR Esotropia mononuclearis (DH500B) OR Exotropia monocularis (DH501A) OR Exotropia alternans (DH501B) OR Vertical strabismus (DH502) OR Hypertropia (DH502A) OR Hypotropia (DH502B) OR Heterotropia Intermittans (DH503) OR Esotropia intermittens monocularis (DH503A) OR Esotropia intermittens alternans (DH503B) OR Exotropia intermittens monocularis (DH503C) OR Exotropia intermittens alternans (DH503D) OR Other and unspecified heterotropia (DH504) OR Cyclotropia (DH504A) OR Heterotropia unspecified (DH504B) OR Heteroforia</p>                                                                                                                                                                                                                       |

|                       |                                                                                                                                                                                                                                                                                                                                                                                                          |
|-----------------------|----------------------------------------------------------------------------------------------------------------------------------------------------------------------------------------------------------------------------------------------------------------------------------------------------------------------------------------------------------------------------------------------------------|
|                       | (DH505) <i>OR</i> Esoforia (DH505A) <i>OR</i> Exoforia (DH505B) <i>OR</i> Hyperphoria alternans (DH505C) <i>OR</i> Strabismus mechanicus (DH506) <i>OR</i> Strabismus due to adherences (DH506B) <i>OR</i> Other form of strabismus (DH508) <i>OR</i> Strabismus unspecified (DH509)                                                                                                                     |
| Strabismus surgery    | <b>NOMESCO</b><br>Recession of extraocular muscle (CEC 00) <i>OR</i> Recession and resection of extraocular muscle (CEC 10) <i>OR</i> Recession and advancement of extraocular muscle (CEC 20) <i>OR</i> Transposition of extraocular muscle with adjustable suture (CEC 60) <i>OR</i> Partial transposition of extraocular muscle (CEC 80) <i>OR</i> Total transposition of extraocular muscle (CEC 90) |
| Decompression surgery | <b>NOMESCO</b><br>Lateral decompression of orbit (CAC 20) <i>OR</i> Decompression of orbit to sinuses (CAC30)                                                                                                                                                                                                                                                                                            |

**Figure 2.** The distribution of sex in thyroid eye disease patients

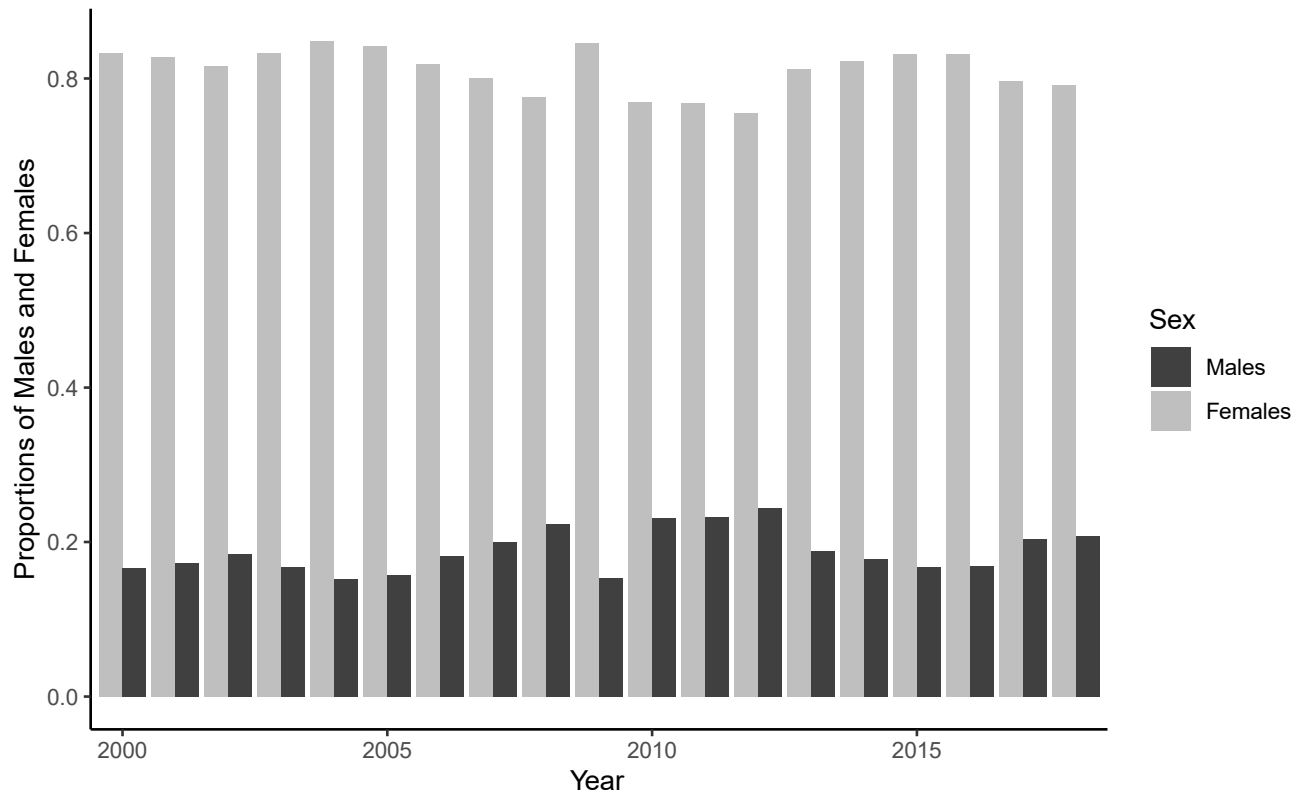

**eTable 2:** Annual incidence (per 100,000) of thyroid eye disease in Denmark from 2000-2018

| Calendar year | N   | Incidence in females |              | Incidence in males |              | Incidence, All |              |
|---------------|-----|----------------------|--------------|--------------------|--------------|----------------|--------------|
|               |     | Numerical            | Standardized | Numerical          | Standardized | Numerical      | Standardized |
| 2000          | 258 | 10.1                 | 11.0         | 2.1                | 2.3          | 6.2            | 6.8          |
| 2001          | 255 | 9.9                  | 10.8         | 2.2                | 2.4          | 6.1            | 6.7          |
| 2002          | 266 | 10.2                 | 11.1         | 2.4                | 2.7          | 6.4            | 7.0          |
| 2003          | 263 | 10.2                 | 11.2         | 2.1                | 2.4          | 6.3            | 6.9          |
| 2004          | 250 | 9.9                  | 10.8         | 1.9                | 2.1          | 6.0            | 6.5          |
| 2005          | 209 | 8.2                  | 8.9          | 1.6                | 1.8          | 5.0            | 5.4          |
| 2006          | 204 | 7.8                  | 8.5          | 1.8                | 2.0          | 4.8            | 5.3          |
| 2007          | 180 | 6.7                  | 7.2          | 1.7                | 1.9          | 4.3            | 4.6          |
| 2008          | 161 | 5.8                  | 6.2          | 1.7                | 1.9          | 3.8            | 4.1          |
| 2009          | 156 | 6.0                  | 6.5          | 1.1                | 1.2          | 3.6            | 3.9          |
| 2010          | 130 | 4.6                  | 4.8          | 1.4                | 1.5          | 3.0            | 3.2          |
| 2011          | 155 | 5.4                  | 5.7          | 1.7                | 1.8          | 3.6            | 3.8          |
| 2012          | 213 | 7.2                  | 7.6          | 2.4                | 2.6          | 4.9            | 5.1          |
| 2013          | 271 | 9.8                  | 10.2         | 2.4                | 2.5          | 6.1            | 6.4          |
| 2014          | 231 | 8.4                  | 8.7          | 1.9                | 2.0          | 5.2            | 5.4          |
| 2015          | 238 | 8.7                  | 8.9          | 1.8                | 1.9          | 5.3            | 5.4          |
| 2016          | 243 | 8.8                  | 8.9          | 1.8                | 1.9          | 5.4            | 5.4          |
| 2017          | 221 | 7.6                  | 7.7          | 2.0                | 2.0          | 4.8            | 4.9          |
| 2018          | 202 | 6.9                  | 6.9          | 1.8                | 1.8          | 4.4            | 4.4          |

**eTable 3:** Sex and mean age of the thyroid eye disease patients in Denmark from 2000-2018

| Calendar Year | Females |          |      | Males |          |      | All |          |      |
|---------------|---------|----------|------|-------|----------|------|-----|----------|------|
|               | N       | Mean Age | SD   | N     | Mean Age | SD   | N   | Mean Age | SD   |
| 2000          | 215     | 50.3     | 14.5 | 43    | 47.0     | 12.3 | 258 | 49.8     | 14.2 |
| 2001          | 211     | 49.6     | 14.7 | 44    | 48.2     | 15.8 | 255 | 49.3     | 14.9 |
| 2002          | 217     | 48.7     | 14.4 | 49    | 51.4     | 15.3 | 266 | 49.2     | 14.6 |
| 2003          | 219     | 51.0     | 15.1 | 44    | 51.9     | 12.4 | 263 | 51.2     | 14.6 |
| 2004          | 212     | 52.0     | 14.6 | 38    | 52.7     | 16.2 | 250 | 52.1     | 14.8 |
| 2005          | 176     | 51.5     | 13.9 | 33    | 50.3     | 12.9 | 209 | 51.3     | 13.7 |
| 2006          | 167     | 51.6     | 14.6 | 37    | 52.3     | 12.3 | 204 | 51.7     | 14.2 |
| 2007          | 144     | 52.9     | 14.1 | 36    | 55.1     | 14.5 | 180 | 53.4     | 14.2 |
| 2008          | 125     | 51.4     | 13.5 | 36    | 52.9     | 13.1 | 161 | 51.8     | 13.4 |
| 2009          | 132     | 52.9     | 14.7 | 24    | 47.6     | 12.4 | 156 | 52.1     | 14.5 |
| 2010          | 100     | 49.7     | 14.6 | 30    | 54.7     | 11.7 | 130 | 50.9     | 14.1 |
| 2011          | 119     | 52.8     | 16.8 | 36    | 51.1     | 13.0 | 155 | 52.4     | 16.0 |
| 2012          | 161     | 51.5     | 14.5 | 52    | 53.5     | 15.9 | 213 | 52.0     | 14.8 |
| 2013          | 220     | 50.8     | 14.3 | 51    | 53.4     | 16.0 | 271 | 51.3     | 14.6 |
| 2014          | 190     | 50.7     | 14.2 | 41    | 52.0     | 15.8 | 231 | 50.9     | 14.5 |
| 2015          | 198     | 50.6     | 13.4 | 40    | 55.5     | 14.7 | 238 | 51.4     | 13.7 |
| 2016          | 202     | 52.0     | 15.1 | 41    | 55.0     | 14.4 | 243 | 52.5     | 15.0 |
| 2017          | 176     | 51.5     | 15.2 | 45    | 53.6     | 16.9 | 221 | 51.9     | 15.6 |
| 2018          | 160     | 50.7     | 14.2 | 42    | 52.0     | 14.0 | 202 | 51.0     | 14.1 |

**eTable 4:** The calculated mean incidence (per 100,000/year) of thyroid eye disease in Denmark from 2000-2018

|                                  | <b>Mean Incidence<br/>PYR (SD)</b> | <b>Highest Incidence</b> | <b>Lowest Incidence</b> |
|----------------------------------|------------------------------------|--------------------------|-------------------------|
| <b>Overall</b>                   | 5.0 ( $\pm$ 1.0)                   | 6.4                      | 3.0                     |
| <b>Overall Standard</b>          | 5.3 ( $\pm$ 1.2)                   | 7.0                      | 3.2                     |
| <b>Males</b>                     | 1.9 ( $\pm$ 0.3)                   | 2.4                      | 1.1                     |
| <b>Males, Standardized</b>       | 2.0 ( $\pm$ 0.4)                   | 2.7                      | 1.2                     |
| <b>Females</b>                   | 8.0 ( $\pm$ 1.8)                   | 10.2                     | 4.6                     |
| <b>Females,<br/>Standardized</b> | 8.5 ( $\pm$ 2.0)                   | 11.2                     | 4.8                     |



**eTable 5:** The thyroid medication prescribed to patients who were euthyroid at the time of being diagnosed with thyroid eye disease (TED) (cumulative incidence given in %)

| Years after diagnosis of TED | Antithyroid medication prescription | L-T4 therapy prescription | Death |
|------------------------------|-------------------------------------|---------------------------|-------|
| 1                            | 37                                  | 9                         | 2     |
| 2                            | 38                                  | 11                        | 2     |
| 3                            | 39                                  | 12                        | 3     |
| 4                            | 41                                  | 13                        | 3     |
| 5                            | 41                                  | 14                        | 4     |
| 6                            | 41                                  | 15                        | 5     |
| 7                            | 42                                  | 15                        | 6     |
| 8                            | 42                                  | 16                        | 6     |
| 9                            | 42                                  | 16                        | 7     |
| 10                           | 42                                  | 17                        | 8     |

**eTable 6:** The cumulative incidence of being diagnosed with strabismus after being diagnosed with thyroid eye disease (TED)

(cumulative incidence given in %)

| Years after diagnosis of TED | Strabismus | Death |
|------------------------------|------------|-------|
| 1                            | 6          | 1     |
| 2                            | 8          | 2     |
| 3                            | 10         | 3     |
| 4                            | 10         | 4     |
| 5                            | 11         | 5     |
| 6                            | 11         | 5     |
| 7                            | 11         | 6     |
| 8                            | 11         | 7     |
| 9                            | 12         | 9     |
| 10                           | 12         | 10    |

**eTable 7:** The cumulative incidence of being diagnosed with strabismus after being diagnosed with thyroid eye disease (TED) stratified by sex (cumulative incidence given in %)

| Years after TED diagnosis | Cumulative incidence in females |       | Cumulative incidence in males |       |
|---------------------------|---------------------------------|-------|-------------------------------|-------|
|                           | Strabismus                      | Death | Strabismus                    | Death |
| 1                         | 5                               | 1     | 6                             | 1     |
| 2                         | 8                               | 2     | 10                            | 3     |
| 3                         | 9                               | 2     | 12                            | 4     |
| 4                         | 10                              | 3     | 13                            | 4     |
| 5                         | 10                              | 4     | 14                            | 6     |
| 6                         | 10                              | 5     | 15                            | 6     |
| 7                         | 10                              | 6     | 15                            | 7     |
| 8                         | 11                              | 7     | 15                            | 8     |
| 9                         | 11                              | 8     | 16                            | 10    |
| 10                        | 11                              | 10    | 16                            | 11    |

**eTable 8:** The cumulative incidence of undergoing strabismus surgery after being diagnosed with thyroid eye disease (TED)  
(cumulative incidence given in %)

| Years after diagnosis of TED | Strabismus Surgery | Death |
|------------------------------|--------------------|-------|
| 1                            | 2                  | 1     |
| 2                            | 5                  | 2     |
| 3                            | 7                  | 3     |
| 4                            | 8                  | 4     |
| 5                            | 9                  | 5     |
| 6                            | 9                  | 6     |
| 7                            | 9                  | 7     |
| 8                            | 10                 | 8     |
| 9                            | 10                 | 9     |
| 10                           | 10                 | 10    |

**eTable 9:** The cumulative incidence of undergoing strabismus surgery after being diagnosed with thyroid eye disease (TED) stratified by sex (cumulative incidence given in %)

| Years after TED diagnosis | Cumulative incidence in females |       | Cumulative incidence in males |       |
|---------------------------|---------------------------------|-------|-------------------------------|-------|
|                           | Strabismus Surgery              | Death | Strabismus Surgery            | Death |
| 1                         | 1                               | 1     | 3                             | 1     |
| 2                         | 4                               | 2     | 8                             | 3     |
| 3                         | 6                               | 3     | 11                            | 4     |
| 4                         | 7                               | 3     | 13                            | 5     |
| 5                         | 8                               | 5     | 14                            | 6     |
| 6                         | 8                               | 5     | 15                            | 6     |
| 7                         | 8                               | 7     | 15                            | 8     |
| 8                         | 8                               | 8     | 15                            | 9     |
| 9                         | 8                               | 9     | 15                            | 10    |
| 10                        | 9                               | 10    | 16                            | 11    |

**eTable 10:** The cumulative incidence of undergoing decompression surgery after being diagnosed with thyroid eye disease (TED)  
(cumulative incidence given in %)

| Years after diagnosis of TED | Decompression Surgery | Death |
|------------------------------|-----------------------|-------|
| 1                            | 2                     | 1     |
| 2                            | 3                     | 2     |
| 3                            | 4                     | 3     |
| 4                            | 5                     | 4     |
| 5                            | 5                     | 5     |
| 6                            | 5                     | 6     |
| 7                            | 5                     | 7     |
| 8                            | 5                     | 8     |
| 9                            | 5                     | 10    |
| 10                           | 6                     | 11    |

**eTable 11:** The cumulative incidence of undergoing decompression surgery after being diagnosed with thyroid eye disease (TED) stratified by sex (cumulative incidence given in %)

| Years after TED diagnosis | Cumulative incidence in females |       | Cumulative incidence in males |       |
|---------------------------|---------------------------------|-------|-------------------------------|-------|
|                           | Decompression surgery           | Death | Decompression Surgery         | Death |
| 1                         | 2                               | 1     | 2                             | 1     |
| 2                         | 3                               | 2     | 4                             | 3     |
| 3                         | 4                               | 3     | 4                             | 4     |
| 4                         | 5                               | 4     | 5                             | 5     |
| 5                         | 5                               | 5     | 5                             | 7     |
| 6                         | 5                               | 6     | 5                             | 7     |
| 7                         | 5                               | 7     | 5                             | 9     |
| 8                         | 5                               | 8     | 6                             | 10    |
| 9                         | 5                               | 9     | 6                             | 12    |
| 10                        | 5                               | 10    | 6                             | 13    |
